# Supplementary material for: Inequalities in family practitioner use by sexual orientation: evidence from the English General Practice Patient Survey
Source: PubMed Central journal article supplement — BMJ Open. 2016 May 12;6(5):e011633. doi: 10.1136/bmjopen-2016-011633 (PMC4874176; doi:10.1136/bmjopen-2016-011633), 2016-05-12
Supplement: bmjopen-2016-011291supp_tables.pdf [file bmjopen-2016-011291supp_tables.pdf]

Table S1 Sample statistics for females and males

| Variable                                  | Female    |       | Male    |       |
|-------------------------------------------|-----------|-------|---------|-------|
|                                           | N         | Mean  | N       | Mean  |
| <b>Family Practitioner use</b>            |           |       |         |       |
| 0-3 months <sup>a</sup>                   | 682,963   | 0.600 | 494,364 | 0.539 |
| 0-6 months <sup>a</sup>                   | 883,547   | 0.776 | 653,322 | 0.713 |
| 0-12 months <sup>a</sup>                  | 1,025,540 | 0.901 | 778,507 | 0.849 |
| <b>Sexual Orientation</b>                 |           |       |         |       |
| Heterosexual <sup>a</sup>                 | 1,046,062 | 0.919 | 840,205 | 0.917 |
| Lesbian/Gay <sup>a</sup>                  | 7,128     | 0.006 | 15,423  | 0.017 |
| Bisexual <sup>a</sup>                     | 5,009     | 0.004 | 4,429   | 0.005 |
| Other <sup>a</sup>                        | 4,987     | 0.004 | 4,092   | 0.005 |
| Prefer not to say <sup>a</sup>            | 43,662    | 0.038 | 35,447  | 0.039 |
| Not answered <sup>a</sup>                 | 31,805    | 0.028 | 17,047  | 0.019 |
| <b>Age</b>                                |           |       |         |       |
| 18-24 <sup>a</sup>                        | 52,425    | 0.046 | 30,025  | 0.033 |
| 25-34 <sup>a</sup>                        | 125,459   | 0.110 | 66,681  | 0.073 |
| 35-44 <sup>a</sup>                        | 159,548   | 0.140 | 105,945 | 0.116 |
| 45-54 <sup>a</sup>                        | 206,793   | 0.182 | 161,548 | 0.176 |
| 55-64 <sup>a</sup>                        | 229,612   | 0.202 | 204,040 | 0.223 |
| 65-74 <sup>a</sup>                        | 207,977   | 0.183 | 208,656 | 0.228 |
| 75-84 <sup>a</sup>                        | 117,226   | 0.103 | 112,558 | 0.123 |
| 85 or over <sup>a</sup>                   | 39,613    | 0.035 | 27,190  | 0.030 |
| <b>Work Status</b>                        |           |       |         |       |
| Full time <sup>a</sup>                    | 320,836   | 0.282 | 387,561 | 0.423 |
| Part time <sup>a</sup>                    | 211,417   | 0.186 | 65,068  | 0.071 |
| Full time education <sup>a</sup>          | 20,060    | 0.018 | 11,632  | 0.013 |
| Unemployed <sup>a</sup>                   | 38,063    | 0.033 | 42,545  | 0.046 |
| Permanently sick or disabled <sup>a</sup> | 47,436    | 0.042 | 45,473  | 0.050 |
| Fully retired <sup>a</sup>                | 368,765   | 0.324 | 337,353 | 0.368 |
| Looking after the home <sup>a</sup>       | 105,283   | 0.093 | 7,323   | 0.008 |
| Doing something else <sup>a</sup>         | 26,793    | 0.024 | 19,688  | 0.022 |
| <b>Deprivation</b>                        |           |       |         |       |
| IMD Score                                 | 1,138,653 | 20.99 | 916,643 | 21.34 |
| <b>Religious Status</b>                   |           |       |         |       |
| No religion <sup>a</sup>                  | 224,784   | 0.197 | 231,182 | 0.252 |
| Buddhist <sup>a</sup>                     | 6,773     | 0.006 | 5,111   | 0.006 |
| Christian <sup>a</sup>                    | 800,760   | 0.703 | 581,314 | 0.634 |
| Hindu <sup>a</sup>                        | 16,861    | 0.015 | 16,829  | 0.018 |
| Jewish <sup>a</sup>                       | 6,820     | 0.006 | 5,364   | 0.006 |
| Muslim <sup>a</sup>                       | 33,694    | 0.030 | 35,832  | 0.039 |
| Sikh <sup>a</sup>                         | 7,374     | 0.007 | 7,084   | 0.008 |
| Other <sup>a</sup>                        | 13,420    | 0.012 | 9,905   | 0.011 |
| Prefer not to say <sup>a</sup>            | 28,167    | 0.025 | 24,022  | 0.026 |
| <b>Ethnicity</b>                          |           |       |         |       |
| White <sup>a</sup>                        | 1,017,014 | 0.893 | 811,291 | 0.885 |
| Black <sup>a</sup>                        | 27,467    | 0.024 | 20,124  | 0.022 |
| Mixed <sup>a</sup>                        | 8,698     | 0.008 | 5,654   | 0.006 |

|                                                          |           |       |         |       |
|----------------------------------------------------------|-----------|-------|---------|-------|
| Asian <sup>a</sup>                                       | 39,508    | 0.035 | 39,112  | 0.043 |
| Chinese <sup>a</sup>                                     | 5,972     | 0.005 | 3,944   | 0.004 |
| Other <sup>a</sup>                                       | 21,137    | 0.893 | 21,454  | 0.023 |
| <b>Rurality</b>                                          |           |       |         |       |
| Rural area <sup>a</sup>                                  | 940,875   | 0.826 | 757,051 | 0.826 |
| <b>Long term medical condition</b>                       |           |       |         |       |
| Alzheimer's or dementia <sup>a</sup>                     | 7,215     | 0.006 | 5,666   | 0.006 |
| Angina or other long term heart problem <sup>a</sup>     | 53,021    | 0.047 | 87,917  | 0.096 |
| Arthritis or long term joint problem <sup>a</sup>        | 218,020   | 0.192 | 132,797 | 0.145 |
| Asthma or long term chest problem <sup>a</sup>           | 131,817   | 0.116 | 93,279  | 0.102 |
| Blindness or severe visual impairment <sup>a</sup>       | 13,347    | 0.012 | 10,438  | 0.011 |
| Cancer in the last 5 years <sup>a</sup>                  | 42,496    | 0.037 | 45,261  | 0.049 |
| Deafness or severe hearing impairment <sup>a</sup>       | 46,713    | 0.041 | 55,551  | 0.061 |
| Diabetes <sup>a</sup>                                    | 81,380    | 0.072 | 110,475 | 0.121 |
| Epilepsy <sup>a</sup>                                    | 11,009    | 0.010 | 10,336  | 0.011 |
| High blood pressure <sup>a</sup>                         | 263,915   | 0.232 | 256,635 | 0.280 |
| Kidney or liver disease <sup>a</sup>                     | 18,425    | 0.016 | 20,538  | 0.022 |
| Learning difficulty <sup>a</sup>                         | 6,784     | 0.006 | 8,773   | 0.010 |
| Long term back problem <sup>a</sup>                      | 126,782   | 0.111 | 101,970 | 0.111 |
| Long term mental health problem <sup>a</sup>             | 47,142    | 0.041 | 32,085  | 0.035 |
| Long term neurological problem <sup>a</sup>              | 22,394    | 0.020 | 18,708  | 0.020 |
| Another long term condition <sup>a</sup>                 | 160,837   | 0.141 | 120,193 | 0.131 |
| None of these conditions <sup>a</sup>                    | 436,579   | 0.383 | 297,793 | 0.325 |
| Prefer not to say <sup>a</sup>                           | 13,232    | 0.012 | 9,890   | 0.011 |
| <b>Long standing medical condition</b>                   |           |       |         |       |
| Long standing health condition <sup>a</sup>              | 718,456   | 0.631 | 631,392 | 0.689 |
| <b>Acute ill health</b>                                  |           |       |         |       |
| Activities limited due to illness or injury <sup>a</sup> | 210,315   | 0.185 | 168,894 | 0.184 |
| <b>Health related quality of life</b>                    |           |       |         |       |
| EQ_5D                                                    | 1,138,653 | 0.80  | 916,643 | 0.80  |
| <b>Smoker Status</b>                                     |           |       |         |       |
| Never smoked <sup>a</sup>                                | 672,416   | 0.591 | 407,533 | 0.445 |
| Former smoker <sup>a</sup>                               | 311,016   | 0.273 | 355,504 | 0.388 |
| Occasional smoker <sup>a</sup>                           | 62,730    | 0.055 | 59,318  | 0.065 |
| Regular smoker <sup>a</sup>                              | 92,491    | 0.081 | 94,288  | 0.103 |
| <b>Family Practitioner characteristics</b>               |           |       |         |       |
| GP's per thousand list size <sup>a</sup>                 | 1,138,653 | 1.01  | 916,643 | 1.01  |
| Practice size (divided by one thousand) <sup>a</sup>     | 1,138,653 | 5.6   | 916,643 | 5.49  |
| Proportion female <sup>a</sup>                           | 1,138,653 | 0.46  | 916,643 | 0.45  |
| Proportion under 50 <sup>a</sup>                         | 1,138,653 | 0.58  | 916,643 | 0.57  |
| Proportion with a UK qualification <sup>a</sup>          | 1,138,653 | 0.71  | 916,643 | 0.70  |
| <b>Time dummies</b>                                      |           |       |         |       |
| January-March 2012 <sup>a</sup>                          | 194,737   | 0.171 | 158,183 | 0.173 |
| July-September 2012 <sup>a</sup>                         | 195,046   | 0.171 | 154,463 | 0.169 |
| January-March 2013 <sup>a</sup>                          | 198,576   | 0.174 | 162,103 | 0.177 |
| July-September 2013 <sup>a</sup>                         | 185,145   | 0.163 | 147,413 | 0.161 |
| January-March 2014 <sup>a</sup>                          | 185,886   | 0.163 | 153,348 | 0.167 |
| July-September 2014 <sup>a</sup>                         | 179,263   | 0.171 | 141,133 | 0.173 |

|            |           |  |         |  |
|------------|-----------|--|---------|--|
| <b>All</b> | 1,138,653 |  | 916,643 |  |
|------------|-----------|--|---------|--|

<sup>a</sup> denotes a dummy variable

Unweighted sample statistics

Table S2 Family practitioner visits in the past three months by sexual orientation: full set of estimates for females and males

|                                               | Female (N=1,138,653) |               | Male (N=916,643) |               |
|-----------------------------------------------|----------------------|---------------|------------------|---------------|
| <b>Sexual Orientation (base heterosexual)</b> |                      |               |                  |               |
| Lesbian/Gay                                   | 0.803***             | [0.755,0.854] | 1.218***         | [1.163,1.276] |
| Bisexual                                      | 0.887**              | [0.817,0.963] | 1.084            | [0.989,1.188] |
| Other                                         | 0.859***             | [0.790,0.935] | 0.916            | [0.831,1.010] |
| Prefer not to say                             | 0.908***             | [0.881,0.936] | 0.957*           | [0.924,0.990] |
| Not answered                                  | 1.016                | [0.985,1.049] | 1.023            | [0.971,1.077] |
| <b>Age (base 55-65)</b>                       |                      |               |                  |               |
| 18-24                                         | 1.823***             | [1.774,1.874] | 0.767***         | [0.738,0.797] |
| 25-34                                         | 2.228***             | [2.184,2.272] | 0.882***         | [0.860,0.905] |
| 35-45                                         | 1.867***             | [1.834,1.901] | 0.997            | [0.977,1.018] |
| 46-54                                         | 1.303***             | [1.282,1.324] | 0.945***         | [0.928,0.962] |
| 65-74                                         | 0.994                | [0.977,1.011] | 1.153***         | [1.131,1.177] |
| 75-84                                         | 1.080***             | [1.057,1.103] | 1.333***         | [1.301,1.367] |
| 85 or over                                    | 0.871***             | [0.843,0.900] | 1.298***         | [1.247,1.351] |
| <b>Work Status (base Full time)</b>           |                      |               |                  |               |
| Part time                                     | 1.200***             | [1.183,1.217] | 1.064***         | [1.037,1.092] |
| Full time education                           | 0.890***             | [0.852,0.931] | 1.016            | [0.956,1.080] |
| Unemployed                                    | 1.240***             | [1.202,1.280] | 1.174***         | [1.139,1.211] |
| Permanently sick or disabled                  | 1.125***             | [1.084,1.167] | 1.120***         | [1.074,1.167] |
| Fully Retired                                 | 1.159***             | [1.138,1.180] | 1.004            | [0.983,1.025] |
| Looking after the home                        | 1.388***             | [1.361,1.415] | 1.172***         | [1.094,1.257] |
| Doing something else                          | 1.301***             | [1.258,1.347] | 1.041            | [0.997,1.088] |
| <b>Deprivation</b>                            |                      |               |                  |               |
| IMD score                                     | 0.998***             | [0.997,0.998] | 0.998***         | [0.997,0.998] |
| <b>Religious Status (base Christian)</b>      |                      |               |                  |               |
| No religion                                   | 0.959***             | [0.946,0.971] | 0.965***         | [0.951,0.980] |
| Buddhist                                      | 0.830***             | [0.776,0.889] | 0.934            | [0.860,1.016] |
| Hindu                                         | 1.114***             | [1.051,1.180] | 1.264***         | [1.191,1.341] |
| Jewish                                        | 1.612***             | [1.504,1.729] | 1.608***         | [1.473,1.757] |
| Muslim                                        | 1.351***             | [1.291,1.414] | 1.501***         | [1.436,1.569] |
| Sikh                                          | 1.332***             | [1.226,1.446] | 1.364***         | [1.255,1.482] |
| Other religion                                | 0.930**              | [0.885,0.977] | 0.957            | [0.902,1.016] |
| Prefer not to say                             | 0.899***             | [0.867,0.932] | 0.968            | [0.929,1.008] |
| <b>Ethnicity (base White)</b>                 |                      |               |                  |               |
| Black                                         | 1.244***             | [1.198,1.291] | 1.267***         | [1.212,1.324] |
| Mixed                                         | 1.036                | [0.978,1.098] | 1.079            | [0.997,1.168] |
| Asian                                         | 1.027                | [0.980,1.076] | 1.205***         | [1.149,1.265] |
| Chinese                                       | 0.816***             | [0.757,0.879] | 0.963            | [0.865,1.072] |
| Other                                         | 1.092***             | [1.044,1.141] | 1.163***         | [1.110,1.218] |
| <b>Rurality</b>                               |                      |               |                  |               |
| Rural area                                    | 0.993                | [0.975,1.010] | 0.986            | [0.966,1.006] |
| <b>Health related quality of life</b>         |                      |               |                  |               |
| EQ_5D score                                   | 0.266***             | [0.256,0.276] | 0.266***         | [0.255,0.278] |
| <b>Long standing medical condition</b>        |                      |               |                  |               |
| Alzheimer's or dementia                       | 0.940                | [0.877,1.008] | 0.971            | [0.885,1.064] |
| Angina or other long term heart problem       | 1.363***             | [1.328,1.400] | 1.421***         | [1.390,1.452] |
| Arthritis or long term joint problem          | 1.108***             | [1.090,1.125] | 1.041***         | [1.020,1.062] |
| Asthma or long term chest problem             | 1.262***             | [1.239,1.285] | 1.189***         | [1.163,1.216] |
| Blindness or severe visual impairment         | 0.952                | [0.902,1.004] | 0.856***         | [0.802,0.914] |

|                                                |          |               |          |               |
|------------------------------------------------|----------|---------------|----------|---------------|
| Cancer in the last 5 years                     | 1.366*** | [1.330,1.404] | 1.548*** | [1.502,1.594] |
| Deafness or severe hearing impairment          | 1.011    | [0.984,1.039] | 0.999    | [0.972,1.027] |
| Diabetes                                       | 1.332*** | [1.302,1.362] | 1.460*** | [1.428,1.492] |
| Epilepsy                                       | 1.191*** | [1.124,1.262] | 1.328*** | [1.244,1.417] |
| High blood pressure                            | 1.246*** | [1.228,1.264] | 1.327*** | [1.307,1.349] |
| Kidney or liver disease                        | 1.231*** | [1.177,1.287] | 1.335*** | [1.272,1.401] |
| Learning difficulty                            | 0.684*** | [0.633,0.738] | 0.808*** | [0.754,0.865] |
| Long term back problem                         | 1.044*** | [1.025,1.064] | 0.915*** | [0.895,0.935] |
| Long term mental health problem                | 1.622*** | [1.569,1.677] | 1.582*** | [1.519,1.647] |
| Long term neurological problem                 | 1.241*** | [1.188,1.296] | 1.289*** | [1.225,1.356] |
| Another long term condition                    | 1.315*** | [1.293,1.337] | 1.267*** | [1.242,1.293] |
| Prefer not to say                              | 1.402*** | [1.337,1.471] | 1.391*** | [1.314,1.472] |
| <b>Health condition</b>                        |          |               |          |               |
| Long standing health condition                 | 1.393*** | [1.371,1.415] | 1.678*** | [1.647,1.710] |
| <b>Acute ill health</b>                        |          |               |          |               |
| Activities limited due to illness or injury    | 1.723*** | [1.696,1.750] | 1.855*** | [1.822,1.889] |
| <b>Smoking Status (base non-smoker)</b>        |          |               |          |               |
| Former smoker                                  | 1.175*** | [1.161,1.189] | 1.139*** | [1.122,1.155] |
| Occasional smoker                              | 1.027*   | [1.003,1.051] | 0.983    | [0.957,1.009] |
| Regular smoker                                 | 0.955*** | [0.936,0.974] | 0.889*** | [0.870,0.908] |
| <b>Practice Characteristics</b>                |          |               |          |               |
| Proportion of practice female                  | 1.117*** | [1.086,1.149] | 1.041*   | [1.008,1.075] |
| Proportion of practice under 50                | 0.984    | [0.959,1.009] | 0.981    | [0.954,1.008] |
| Proportion of practice with a UK qualification | 1.066*** | [1.043,1.090] | 1.018    | [0.993,1.043] |
| Family practitioners per 1000 patients         | 1.102*** | [1.085,1.119] | 1.088*** | [1.070,1.107] |
| Practice list size                             | 0.995*** | [0.993,0.997] | 0.995*** | [0.992,0.997] |
| <b>Time dummies (Base January-March 2012)</b>  |          |               |          |               |
| July-September 2012                            | 0.998    | [0.980,1.016] | 1.053*** | [1.030,1.076] |
| January-March 2013                             | 1.042*** | [1.023,1.061] | 1.086*** | [1.062,1.110] |
| July-September 2013                            | 0.991    | [0.974,1.009] | 1.043*** | [1.020,1.066] |
| January-March 2014                             | 1.027**  | [1.009,1.046] | 1.047*** | [1.024,1.071] |
| July-September 2014                            | 0.982*   | [0.964,1.000] | 1.011    | [0.989,1.034] |

Logistic regressions of family practitioner use in the past three months

Standard errors are robust to heteroskedasticity and clustered at the practice level

Exponentiated coefficients; 95% confidence intervals in brackets

\*  $p < 0.05$ , \*\*  $p < 0.01$ , \*\*\*  $p < 0.001$

Table S3 Family practitioner visit in the past three months by sexual orientation and interacted with practice characteristics: full set of estimates for females

|                                                                                                               | Proportion of practice under 50<br>interaction model (N=1,138,653) |               | Proportion of practice female interaction<br>model (N=1,138,653) |               | Proportion of practice qualified in the UK<br>interaction model (N=1,138,653) |               |
|---------------------------------------------------------------------------------------------------------------|--------------------------------------------------------------------|---------------|------------------------------------------------------------------|---------------|-------------------------------------------------------------------------------|---------------|
| <b>Sexual Orientation interaction with proportion of practice under 50 (base Heterosexual)</b>                |                                                                    |               |                                                                  |               |                                                                               |               |
| Lesbian*under50                                                                                               | 1.022                                                              | [0.812,1.285] |                                                                  |               |                                                                               |               |
| Bisexual*under50                                                                                              | 1.001                                                              | [0.761,1.317] |                                                                  |               |                                                                               |               |
| Other*under50                                                                                                 | 0.750*                                                             | [0.578,0.974] |                                                                  |               |                                                                               |               |
| Prefer not to say*under50                                                                                     | 0.923                                                              | [0.844,1.009] |                                                                  |               |                                                                               |               |
| Not answered*under50                                                                                          | 0.892*                                                             | [0.805,0.989] |                                                                  |               |                                                                               |               |
| <b>Sexual Orientation interaction with proportion of practice female (base Heterosexual)</b>                  |                                                                    |               |                                                                  |               |                                                                               |               |
| Lesbian*proportionfemale                                                                                      |                                                                    |               | 1.084                                                            | [0.841,1.398] |                                                                               |               |
| Bisexual*proportionfemale                                                                                     |                                                                    |               | 1.329                                                            | [0.965,1.831] |                                                                               |               |
| Other*proportionfemale                                                                                        |                                                                    |               | 0.925                                                            | [0.678,1.261] |                                                                               |               |
| Prefernot*proportionfemale                                                                                    |                                                                    |               | 0.969                                                            | [0.873,1.076] |                                                                               |               |
| Not answered *proportionfemale                                                                                |                                                                    |               | 1.045                                                            | [0.928,1.175] |                                                                               |               |
| <b>Sexual Orientation interaction with proportion of practice with a UK qualification (base Heterosexual)</b> |                                                                    |               |                                                                  |               |                                                                               |               |
| Lesbian*ukcoq                                                                                                 |                                                                    |               |                                                                  |               | 0.935                                                                         | [0.766,1.143] |
| Bisexual*ukcoq                                                                                                |                                                                    |               |                                                                  |               | 1.224                                                                         | [0.966,1.550] |
| Other*ukcoq                                                                                                   |                                                                    |               |                                                                  |               | 0.750*                                                                        | [0.598,0.940] |
| Prefernot*ukcoq                                                                                               |                                                                    |               |                                                                  |               | 0.890**                                                                       | [0.823,0.963] |
| Not answered *ukcoq                                                                                           |                                                                    |               |                                                                  |               | 0.915*                                                                        | [0.838,0.998] |
| <b>Sexual Orientation (base Heterosexual)</b>                                                                 |                                                                    |               |                                                                  |               |                                                                               |               |
| Lesbian                                                                                                       | 0.792**                                                            | [0.682,0.920] | 0.771***                                                         | [0.671,0.886] | 0.846*                                                                        | [0.717,0.998] |
| Bisexual                                                                                                      | 0.887                                                              | [0.740,1.063] | 0.772**                                                          | [0.649,0.918] | 0.763**                                                                       | [0.633,0.920] |
| Other                                                                                                         | 1.021                                                              | [0.864,1.208] | 0.891                                                            | [0.758,1.048] | 1.050                                                                         | [0.887,1.245] |
| Prefer not to say                                                                                             | 0.954                                                              | [0.899,1.012] | 0.922**                                                          | [0.871,0.975] | 0.988                                                                         | [0.930,1.049] |
| Not answered                                                                                                  | 1.089*                                                             | [1.020,1.163] | 0.996                                                            | [0.937,1.058] | 1.084*                                                                        | [1.014,1.158] |
| <b>Age (base 55-65)</b>                                                                                       |                                                                    |               |                                                                  |               |                                                                               |               |
| 16-24                                                                                                         | 1.824***                                                           | [1.774,1.874] | 1.823***                                                         | [1.774,1.874] | 1.824***                                                                      | [1.774,1.875] |
| 25-34                                                                                                         | 2.227***                                                           | [2.183,2.272] | 2.228***                                                         | [2.184,2.273] | 2.227***                                                                      | [2.183,2.272] |
| 35-44                                                                                                         | 1.867***                                                           | [1.834,1.901] | 1.867***                                                         | [1.834,1.901] | 1.867***                                                                      | [1.834,1.901] |
| 45-54                                                                                                         | 1.303***                                                           | [1.282,1.324] | 1.303***                                                         | [1.282,1.324] | 1.303***                                                                      | [1.282,1.324] |
| 65-74                                                                                                         | 0.994                                                              | [0.977,1.011] | 0.994                                                            | [0.977,1.011] | 0.994                                                                         | [0.978,1.011] |
| 75-84                                                                                                         | 1.080***                                                           | [1.057,1.103] | 1.080***                                                         | [1.057,1.103] | 1.080***                                                                      | [1.057,1.103] |
| 85 and over                                                                                                   | 0.871***                                                           | [0.843,0.900] | 0.871***                                                         | [0.843,0.900] | 0.871***                                                                      | [0.843,0.900] |

| <b>Work Status (base Full time)</b>      |                      |               |                      |               |                      |               |
|------------------------------------------|----------------------|---------------|----------------------|---------------|----------------------|---------------|
| Part time                                | 1.200 <sup>***</sup> | [1.183,1.217] | 1.200 <sup>***</sup> | [1.183,1.217] | 1.200 <sup>***</sup> | [1.183,1.217] |
| Full time education                      | 0.891 <sup>***</sup> | [0.852,0.931] | 0.890 <sup>***</sup> | [0.852,0.930] | 0.890 <sup>***</sup> | [0.852,0.930] |
| Unemployed                               | 1.240 <sup>***</sup> | [1.202,1.280] | 1.240 <sup>***</sup> | [1.202,1.280] | 1.240 <sup>***</sup> | [1.202,1.280] |
| Permanently sick or disabled             | 1.125 <sup>***</sup> | [1.084,1.167] | 1.125 <sup>***</sup> | [1.084,1.167] | 1.125 <sup>***</sup> | [1.084,1.167] |
| Fully Retired                            | 1.159 <sup>***</sup> | [1.138,1.180] | 1.159 <sup>***</sup> | [1.138,1.180] | 1.159 <sup>***</sup> | [1.138,1.180] |
| Looking after the home                   | 1.387 <sup>***</sup> | [1.361,1.415] | 1.388 <sup>***</sup> | [1.361,1.415] | 1.387 <sup>***</sup> | [1.361,1.415] |
| Doing something else                     | 1.301 <sup>***</sup> | [1.258,1.347] | 1.301 <sup>***</sup> | [1.258,1.347] | 1.301 <sup>***</sup> | [1.258,1.346] |
| <b>Deprivation</b>                       |                      |               |                      |               |                      |               |
| IMD score                                | 0.998 <sup>***</sup> | [0.997,0.998] | 0.998 <sup>***</sup> | [0.997,0.998] | 0.998 <sup>***</sup> | [0.997,0.998] |
| <b>Religious Status (base Christian)</b> |                      |               |                      |               |                      |               |
| No religion                              | 0.959 <sup>***</sup> | [0.946,0.971] | 0.959 <sup>***</sup> | [0.946,0.971] | 0.959 <sup>***</sup> | [0.946,0.971] |
| Buddhist                                 | 0.830 <sup>***</sup> | [0.776,0.889] | 0.830 <sup>***</sup> | [0.776,0.889] | 0.831 <sup>***</sup> | [0.776,0.889] |
| Hindu                                    | 1.112 <sup>***</sup> | [1.050,1.179] | 1.114 <sup>***</sup> | [1.051,1.180] | 1.111 <sup>***</sup> | [1.048,1.177] |
| Jewish                                   | 1.612 <sup>***</sup> | [1.504,1.729] | 1.612 <sup>***</sup> | [1.504,1.729] | 1.612 <sup>***</sup> | [1.504,1.729] |
| Muslim                                   | 1.350 <sup>***</sup> | [1.291,1.413] | 1.351 <sup>***</sup> | [1.291,1.413] | 1.348 <sup>***</sup> | [1.288,1.410] |
| Sikh                                     | 1.330 <sup>***</sup> | [1.225,1.445] | 1.331 <sup>***</sup> | [1.226,1.446] | 1.329 <sup>***</sup> | [1.224,1.443] |
| Other religion                           | 0.930 <sup>**</sup>  | [0.885,0.977] | 0.930 <sup>**</sup>  | [0.885,0.977] | 0.931 <sup>**</sup>  | [0.886,0.978] |
| Prefer not to say                        | 0.899 <sup>***</sup> | [0.867,0.932] | 0.899 <sup>***</sup> | [0.867,0.932] | 0.901 <sup>***</sup> | [0.869,0.934] |
| <b>Ethnicity (base White)</b>            |                      |               |                      |               |                      |               |
| Black                                    | 1.244 <sup>***</sup> | [1.198,1.291] | 1.244 <sup>***</sup> | [1.198,1.292] | 1.244 <sup>***</sup> | [1.198,1.291] |
| Mixed                                    | 1.036                | [0.978,1.098] | 1.036                | [0.978,1.098] | 1.036                | [0.978,1.098] |
| Asian                                    | 1.027                | [0.980,1.076] | 1.027                | [0.980,1.076] | 1.027                | [0.980,1.076] |
| Chinese                                  | 0.816 <sup>***</sup> | [0.757,0.879] | 0.816 <sup>***</sup> | [0.757,0.879] | 0.816 <sup>***</sup> | [0.757,0.879] |
| Other                                    | 1.091 <sup>***</sup> | [1.044,1.141] | 1.092 <sup>***</sup> | [1.044,1.141] | 1.090 <sup>***</sup> | [1.043,1.139] |
| <b>Rurality</b>                          |                      |               |                      |               |                      |               |
| Rural area                               | 0.993                | [0.975,1.010] | 0.993                | [0.975,1.010] | 0.993                | [0.975,1.011] |
| <b>Health related quality of life</b>    |                      |               |                      |               |                      |               |
| EQ_5D score                              | 0.266 <sup>***</sup> | [0.256,0.276] | 0.266 <sup>***</sup> | [0.256,0.276] | 0.266 <sup>***</sup> | [0.256,0.276] |
| <b>Long standing medical condition</b>   |                      |               |                      |               |                      |               |
| Alzheimer's or dementia                  | 0.940                | [0.877,1.008] | 0.940                | [0.877,1.008] | 0.940                | [0.877,1.008] |
| Angina or other long term heart problem  | 1.363 <sup>***</sup> | [1.328,1.400] | 1.363 <sup>***</sup> | [1.328,1.400] | 1.363 <sup>***</sup> | [1.328,1.400] |
| Arthritis or long term joint problem     | 1.108 <sup>***</sup> | [1.090,1.125] | 1.108 <sup>***</sup> | [1.090,1.125] | 1.108 <sup>***</sup> | [1.090,1.125] |

|                                                |                      |               |                      |               |                      |               |
|------------------------------------------------|----------------------|---------------|----------------------|---------------|----------------------|---------------|
| Asthma or long term chest problem              | 1.262 <sup>***</sup> | [1.239,1.285] | 1.262 <sup>***</sup> | [1.239,1.285] | 1.262 <sup>***</sup> | [1.239,1.285] |
| Blindness or severe visual impairment          | 0.952                | [0.902,1.004] | 0.952                | [0.902,1.004] | 0.952                | [0.902,1.004] |
| Cancer in the last 5 years                     | 1.366 <sup>***</sup> | [1.330,1.404] | 1.366 <sup>***</sup> | [1.330,1.404] | 1.366 <sup>***</sup> | [1.330,1.404] |
| Deafness or severe hearing impairment          | 1.011                | [0.984,1.039] | 1.011                | [0.984,1.039] | 1.011                | [0.984,1.039] |
| Diabetes                                       | 1.331 <sup>***</sup> | [1.302,1.362] | 1.332 <sup>***</sup> | [1.302,1.362] | 1.332 <sup>***</sup> | [1.302,1.362] |
| Epilepsy                                       | 1.191 <sup>***</sup> | [1.124,1.262] | 1.191 <sup>***</sup> | [1.124,1.262] | 1.191 <sup>***</sup> | [1.124,1.263] |
| High blood pressure                            | 1.246 <sup>***</sup> | [1.228,1.264] | 1.246 <sup>***</sup> | [1.228,1.264] | 1.246 <sup>***</sup> | [1.228,1.264] |
| Kidney or liver disease                        | 1.231 <sup>***</sup> | [1.177,1.287] | 1.231 <sup>***</sup> | [1.177,1.288] | 1.231 <sup>***</sup> | [1.177,1.287] |
| Learning difficulty                            | 0.684 <sup>***</sup> | [0.633,0.738] | 0.684 <sup>***</sup> | [0.633,0.738] | 0.684 <sup>***</sup> | [0.633,0.738] |
| Long term back problem                         | 1.044 <sup>***</sup> | [1.025,1.064] | 1.044 <sup>***</sup> | [1.025,1.064] | 1.044 <sup>***</sup> | [1.025,1.064] |
| Long term mental health problem                | 1.622 <sup>***</sup> | [1.569,1.677] | 1.622 <sup>***</sup> | [1.569,1.677] | 1.622 <sup>***</sup> | [1.569,1.677] |
| Long term neurological problem                 | 1.241 <sup>***</sup> | [1.188,1.296] | 1.241 <sup>***</sup> | [1.188,1.296] | 1.241 <sup>***</sup> | [1.189,1.296] |
| Another long term condition                    | 1.315 <sup>***</sup> | [1.293,1.337] | 1.315 <sup>***</sup> | [1.293,1.337] | 1.315 <sup>***</sup> | [1.293,1.337] |
| Prefer not to say                              | 1.402 <sup>***</sup> | [1.337,1.471] | 1.402 <sup>***</sup> | [1.336,1.471] | 1.402 <sup>***</sup> | [1.336,1.470] |
| <b>Health condition</b>                        |                      |               |                      |               |                      |               |
| Long standing health condition                 | 1.393 <sup>***</sup> | [1.371,1.415] | 1.393 <sup>***</sup> | [1.371,1.415] | 1.393 <sup>***</sup> | [1.371,1.415] |
| <b>Acute ill health</b>                        |                      |               |                      |               |                      |               |
| Activities limited due to illness or injury    | 1.723 <sup>***</sup> | [1.696,1.750] | 1.723 <sup>***</sup> | [1.696,1.750] | 1.723 <sup>***</sup> | [1.696,1.750] |
| <b>Smoking Status (base non-smoker)</b>        |                      |               |                      |               |                      |               |
| Former smoker                                  | 1.175 <sup>***</sup> | [1.161,1.189] | 1.175 <sup>***</sup> | [1.161,1.189] | 1.175 <sup>***</sup> | [1.161,1.189] |
| Occasional smoker                              | 1.027 <sup>*</sup>   | [1.003,1.051] | 1.027 <sup>*</sup>   | [1.003,1.051] | 1.027 <sup>*</sup>   | [1.003,1.051] |
| Regular smoker                                 | 0.955 <sup>***</sup> | [0.936,0.974] | 0.955 <sup>***</sup> | [0.936,0.974] | 0.955 <sup>***</sup> | [0.936,0.974] |
| <b>Practice Characteristics</b>                |                      |               |                      |               |                      |               |
| Proportion of practice female                  | 1.117 <sup>***</sup> | [1.086,1.149] | 1.115 <sup>***</sup> | [1.084,1.148] | 1.117 <sup>***</sup> | [1.086,1.149] |
| Proportion of practice under 50                | 0.990                | [0.965,1.016] | 0.984                | [0.959,1.009] | 0.984                | [0.960,1.009] |
| Proportion of practice with a UK qualification | 1.066 <sup>***</sup> | [1.043,1.090] | 1.066 <sup>***</sup> | [1.043,1.090] | 1.074 <sup>***</sup> | [1.050,1.098] |
| Family practitioners per 1000 patients         | 1.102 <sup>***</sup> | [1.085,1.119] | 1.102 <sup>***</sup> | [1.085,1.119] | 1.102 <sup>***</sup> | [1.085,1.119] |
| Practice list size                             | 0.995 <sup>***</sup> | [0.993,0.997] | 0.995 <sup>***</sup> | [0.993,0.997] | 0.995 <sup>***</sup> | [0.993,0.997] |
| <b>Time Dummies (Base January-March 2012)</b>  |                      |               |                      |               |                      |               |



|                     |                      |               |                      |               |                      |               |
|---------------------|----------------------|---------------|----------------------|---------------|----------------------|---------------|
| July-September 2012 | 0.998                | [0.980,1.016] | 0.998                | [0.980,1.016] | 0.998                | [0.980,1.016] |
| January-March 2013  | 1.042 <sup>***</sup> | [1.023,1.060] | 1.042 <sup>***</sup> | [1.023,1.061] | 1.042 <sup>***</sup> | [1.023,1.061] |
| July-September 2013 | 0.991                | [0.974,1.009] | 0.991                | [0.974,1.009] | 0.991                | [0.974,1.009] |
| January-March 2014  | 1.027 <sup>**</sup>  | [1.009,1.046] | 1.027 <sup>**</sup>  | [1.009,1.046] | 1.027 <sup>**</sup>  | [1.009,1.046] |
| July-September 2014 | 0.982 <sup>*</sup>   | [0.964,1.000] | 0.982 <sup>*</sup>   | [0.964,1.000] | 0.982 <sup>*</sup>   | [0.964,1.000] |

Logistic regressions of family practitioner use in the past three months with practice characteristic interactions, for females

Standard errors are robust to heteroskedasticity and clustered at the practice level

Exponentiated coefficients; 95% confidence intervals in brackets

\*  $p < 0.05$ , \*\*  $p < 0.01$ , \*\*\*  $p < 0.001$

Table S4 Family practitioner visit in the past three months by sexual orientation and interacted with practice characteristics: full set of estimates for males

|                                                                                                               | Proportion of practice under 50 interaction model (N=916,643) |               | Proportion of practice female interaction model (N=916,643) |               | Proportion of practice qualified in the UK interaction model (N=916,643) |               |
|---------------------------------------------------------------------------------------------------------------|---------------------------------------------------------------|---------------|-------------------------------------------------------------|---------------|--------------------------------------------------------------------------|---------------|
| <b>Sexual Orientation interaction with proportion of practice under 50 (base Heterosexual)</b>                |                                                               |               |                                                             |               |                                                                          |               |
| Gay*under50                                                                                                   | 1.142                                                         | [0.976,1.337] |                                                             |               |                                                                          |               |
| Bisexual*under50                                                                                              | 1.167                                                         | [0.873,1.561] |                                                             |               |                                                                          |               |
| Other*under50                                                                                                 | 0.749                                                         | [0.552,1.016] |                                                             |               |                                                                          |               |
| Prefernot*under50                                                                                             | 1.011                                                         | [0.911,1.122] |                                                             |               |                                                                          |               |
| Not answered *under50                                                                                         | 0.883                                                         | [0.753,1.037] |                                                             |               |                                                                          |               |
| <b>Sexual Orientation interaction with proportion of practice female (base Heterosexual)</b>                  |                                                               |               |                                                             |               |                                                                          |               |
| Gay*proportionfemale                                                                                          |                                                               |               | 1.233*                                                      | [1.037,1.466] |                                                                          |               |
| Bisexual*proportionfemale                                                                                     |                                                               |               | 0.931                                                       | [0.659,1.315] |                                                                          |               |
| Other*proportionfemale                                                                                        |                                                               |               | 0.947                                                       | [0.674,1.332] |                                                                          |               |
| Prefernot*proportionfemale                                                                                    |                                                               |               | 0.907                                                       | [0.806,1.020] |                                                                          |               |
| Not answered *proportionfemale                                                                                |                                                               |               | 0.946                                                       | [0.790,1.133] |                                                                          |               |
| <b>Sexual Orientation interaction with proportion of practice with a UK qualification (base Heterosexual)</b> |                                                               |               |                                                             |               |                                                                          |               |
| Gay*ukcoq                                                                                                     |                                                               |               |                                                             |               | 0.978                                                                    | [0.844,1.133] |
| Bisexual*ukcoq                                                                                                |                                                               |               |                                                             |               | 0.919                                                                    | [0.717,1.177] |
| Other*ukcoq                                                                                                   |                                                               |               |                                                             |               | 0.781*                                                                   | [0.610,1.000] |
| Prefernot*ukcoq                                                                                               |                                                               |               |                                                             |               | 0.887**                                                                  | [0.811,0.970] |
| Not answered *ukcoq                                                                                           |                                                               |               |                                                             |               | 0.895                                                                    | [0.782,1.024] |
| <b>Sexual Orientation (base Heterosexual)</b>                                                                 |                                                               |               |                                                             |               |                                                                          |               |
| Gay                                                                                                           | 1.119*                                                        | [1.005,1.245] | 1.096                                                       | [0.997,1.205] | 1.238***                                                                 | [1.102,1.392] |
| Bisexual                                                                                                      | 0.986                                                         | [0.819,1.187] | 1.122                                                       | [0.937,1.343] | 1.153                                                                    | [0.959,1.386] |
| Other                                                                                                         | 1.086                                                         | [0.890,1.325] | 0.940                                                       | [0.786,1.124] | 1.085                                                                    | [0.914,1.288] |
| Prefer not to say                                                                                             | 0.951                                                         | [0.889,1.016] | 1.002                                                       | [0.941,1.066] | 1.041                                                                    | [0.974,1.113] |
| Not answered                                                                                                  | 1.101                                                         | [0.997,1.215] | 1.049                                                       | [0.957,1.150] | 1.105*                                                                   | [1.005,1.215] |
| <b>Age (base 55-65)</b>                                                                                       |                                                               |               |                                                             |               |                                                                          |               |
| 18-24                                                                                                         | 1.041*                                                        | [1.009,1.075] | 1.042*                                                      | [1.008,1.077] | 1.041*                                                                   | [1.008,1.075] |
| 25-34                                                                                                         | 0.980                                                         | [0.953,1.008] | 0.981                                                       | [0.954,1.008] | 0.981                                                                    | [0.955,1.009] |
| 35-45                                                                                                         | 1.018                                                         | [0.993,1.043] | 1.018                                                       | [0.993,1.044] | 1.028*                                                                   | [1.002,1.054] |
| 46-54                                                                                                         | 1.088***                                                      | [1.070,1.107] | 1.088***                                                    | [1.070,1.107] | 1.088***                                                                 | [1.070,1.107] |
| 65-74                                                                                                         | 0.995***                                                      | [0.992,0.997] | 0.995***                                                    | [0.992,0.997] | 0.995***                                                                 | [0.992,0.997] |
| 75-84                                                                                                         | 0.767***                                                      | [0.738,0.797] | 0.767***                                                    | [0.738,0.797] | 0.767***                                                                 | [0.738,0.797] |
| 85 or over                                                                                                    | 0.882***                                                      | [0.860,0.905] | 0.882***                                                    | [0.860,0.905] | 0.882***                                                                 | [0.860,0.905] |

| <b>Work Status (base Full time)</b>      |                      |               |                      |               |                      |               |
|------------------------------------------|----------------------|---------------|----------------------|---------------|----------------------|---------------|
| Part time                                | 0.997                | [0.977,1.018] | 0.997                | [0.977,1.018] | 0.997                | [0.977,1.018] |
| Full time education                      | 0.945 <sup>***</sup> | [0.928,0.962] | 0.945 <sup>***</sup> | [0.928,0.962] | 0.945 <sup>***</sup> | [0.928,0.962] |
| Unemployed                               | 1.153 <sup>***</sup> | [1.131,1.177] | 1.153 <sup>***</sup> | [1.131,1.177] | 1.153 <sup>***</sup> | [1.131,1.177] |
| Permanently sick or disabled             | 1.333 <sup>***</sup> | [1.301,1.367] | 1.333 <sup>***</sup> | [1.301,1.367] | 1.334 <sup>***</sup> | [1.301,1.367] |
| Fully Retired                            | 1.298 <sup>***</sup> | [1.247,1.351] | 1.298 <sup>***</sup> | [1.247,1.350] | 1.298 <sup>***</sup> | [1.248,1.351] |
| Looking after the home                   | 1.064 <sup>***</sup> | [1.037,1.092] | 1.064 <sup>***</sup> | [1.037,1.092] | 1.064 <sup>***</sup> | [1.037,1.092] |
| Doing something else                     | 1.016                | [0.955,1.079] | 1.016                | [0.955,1.080] | 1.016                | [0.956,1.080] |
| <b>Deprivation</b>                       |                      |               |                      |               |                      |               |
| IMD score                                | 1.174 <sup>***</sup> | [1.139,1.211] | 1.174 <sup>***</sup> | [1.139,1.211] | 1.174 <sup>***</sup> | [1.139,1.211] |
| <b>Religious Status (base Christian)</b> |                      |               |                      |               |                      |               |
| No religion                              | 1.120 <sup>***</sup> | [1.074,1.167] | 1.120 <sup>***</sup> | [1.074,1.167] | 1.120 <sup>***</sup> | [1.074,1.167] |
| Buddhist                                 | 1.004                | [0.983,1.025] | 1.004                | [0.983,1.025] | 1.004                | [0.983,1.025] |
| Hindu                                    | 1.172 <sup>***</sup> | [1.093,1.257] | 1.172 <sup>***</sup> | [1.094,1.257] | 1.172 <sup>***</sup> | [1.094,1.257] |
| Jewish                                   | 1.041                | [0.997,1.088] | 1.041                | [0.997,1.088] | 1.041                | [0.997,1.088] |
| Muslim                                   | 0.998 <sup>***</sup> | [0.997,0.998] | 0.998 <sup>***</sup> | [0.997,0.998] | 0.998 <sup>***</sup> | [0.997,0.998] |
| Sikh                                     | 0.965 <sup>***</sup> | [0.951,0.980] | 0.965 <sup>***</sup> | [0.951,0.980] | 0.965 <sup>***</sup> | [0.951,0.980] |
| Other religion                           | 0.935                | [0.860,1.016] | 0.935                | [0.860,1.016] | 0.934                | [0.859,1.015] |
| Prefer not to say                        | 1.263 <sup>***</sup> | [1.190,1.341] | 1.263 <sup>***</sup> | [1.190,1.341] | 1.261 <sup>***</sup> | [1.188,1.338] |
| <b>Ethnicity (base White)</b>            |                      |               |                      |               |                      |               |
| Black                                    | 1.608 <sup>***</sup> | [1.473,1.756] | 1.608 <sup>***</sup> | [1.473,1.756] | 1.608 <sup>***</sup> | [1.472,1.756] |
| Mixed                                    | 1.501 <sup>***</sup> | [1.436,1.569] | 1.500 <sup>***</sup> | [1.435,1.568] | 1.498 <sup>***</sup> | [1.433,1.566] |
| Asian                                    | 1.363 <sup>***</sup> | [1.254,1.481] | 1.362 <sup>***</sup> | [1.253,1.480] | 1.359 <sup>***</sup> | [1.250,1.477] |
| Chinese                                  | 0.957                | [0.902,1.016] | 0.958                | [0.902,1.017] | 0.958                | [0.903,1.017] |
| Other                                    | 0.968                | [0.929,1.008] | 0.969                | [0.930,1.009] | 0.970                | [0.932,1.011] |
| <b>Rurality</b>                          |                      |               |                      |               |                      |               |
| Rural area                               | 1.267 <sup>***</sup> | [1.212,1.324] | 1.267 <sup>***</sup> | [1.212,1.324] | 1.267 <sup>***</sup> | [1.212,1.324] |
| <b>Health related quality of life</b>    |                      |               |                      |               |                      |               |
| EQ_5D score                              | 1.079                | [0.997,1.168] | 1.079                | [0.997,1.168] | 1.079                | [0.997,1.168] |
| <b>Long standing medical condition</b>   |                      |               |                      |               |                      |               |
| Alzheimer's or dementia                  | 1.206 <sup>***</sup> | [1.149,1.265] | 1.205 <sup>***</sup> | [1.149,1.265] | 1.206 <sup>***</sup> | [1.149,1.265] |
| Angina or other long term heart problem  | 0.962                | [0.865,1.071] | 0.963                | [0.865,1.071] | 0.963                | [0.865,1.072] |
| Arthritis or long term joint problem     | 1.162 <sup>***</sup> | [1.109,1.218] | 1.162 <sup>***</sup> | [1.109,1.218] | 1.161 <sup>***</sup> | [1.108,1.217] |

|                                                |                      |               |                      |               |                      |               |
|------------------------------------------------|----------------------|---------------|----------------------|---------------|----------------------|---------------|
| Asthma or long term chest problem              | 0.986                | [0.966,1.005] | 0.986                | [0.966,1.006] | 0.986                | [0.966,1.006] |
| Blindness or severe visual impairment          | 0.266 <sup>***</sup> | [0.254,0.278] | 0.266 <sup>***</sup> | [0.255,0.278] | 0.266 <sup>***</sup> | [0.254,0.278] |
| Cancer in the last 5 years                     | 0.971                | [0.885,1.064] | 0.971                | [0.886,1.065] | 0.971                | [0.885,1.064] |
| Deafness or severe hearing impairment          | 1.421 <sup>***</sup> | [1.390,1.452] | 1.421 <sup>***</sup> | [1.390,1.452] | 1.421 <sup>***</sup> | [1.390,1.452] |
| Diabetes                                       | 1.041 <sup>***</sup> | [1.020,1.062] | 1.041 <sup>***</sup> | [1.020,1.062] | 1.041 <sup>***</sup> | [1.020,1.062] |
| Epilepsy                                       | 1.189 <sup>***</sup> | [1.163,1.216] | 1.189 <sup>***</sup> | [1.163,1.216] | 1.189 <sup>***</sup> | [1.163,1.216] |
| High blood pressure                            | 0.856 <sup>***</sup> | [0.802,0.914] | 0.856 <sup>***</sup> | [0.802,0.914] | 0.856 <sup>***</sup> | [0.802,0.913] |
| Kidney or liver disease                        | 1.548 <sup>***</sup> | [1.502,1.594] | 1.548 <sup>***</sup> | [1.502,1.594] | 1.548 <sup>***</sup> | [1.502,1.594] |
| Learning difficulty                            | 0.999                | [0.972,1.027] | 0.999                | [0.972,1.027] | 0.999                | [0.972,1.027] |
| Long term back problem                         | 1.460 <sup>***</sup> | [1.428,1.492] | 1.460 <sup>***</sup> | [1.428,1.492] | 1.460 <sup>***</sup> | [1.428,1.492] |
| Long term mental health problem                | 1.328 <sup>***</sup> | [1.244,1.417] | 1.328 <sup>***</sup> | [1.244,1.417] | 1.329 <sup>***</sup> | [1.245,1.418] |
| Long term neurological problem                 | 1.327 <sup>***</sup> | [1.307,1.349] | 1.327 <sup>***</sup> | [1.307,1.349] | 1.327 <sup>***</sup> | [1.307,1.349] |
| Another long term condition                    | 1.335 <sup>***</sup> | [1.272,1.401] | 1.335 <sup>***</sup> | [1.272,1.401] | 1.335 <sup>***</sup> | [1.272,1.401] |
| Prefer not to say                              | 0.808 <sup>***</sup> | [0.755,0.865] | 0.808 <sup>***</sup> | [0.755,0.866] | 0.808 <sup>***</sup> | [0.755,0.866] |
| <b>Health condition</b>                        |                      |               |                      |               |                      |               |
| Long standing health condition                 | 0.915 <sup>***</sup> | [0.895,0.935] | 0.915 <sup>***</sup> | [0.895,0.935] | 0.914 <sup>***</sup> | [0.895,0.935] |
| <b>Acute ill health</b>                        |                      |               |                      |               |                      |               |
| Activities limited due to illness or injury    | 1.581 <sup>***</sup> | [1.519,1.646] | 1.581 <sup>***</sup> | [1.519,1.646] | 1.582 <sup>***</sup> | [1.519,1.647] |
| <b>Smoking Status (base non-smoker)</b>        |                      |               |                      |               |                      |               |
| Former smoker                                  | 1.289 <sup>***</sup> | [1.225,1.356] | 1.289 <sup>***</sup> | [1.225,1.356] | 1.289 <sup>***</sup> | [1.225,1.356] |
| Occasional smoker                              | 1.267 <sup>***</sup> | [1.242,1.293] | 1.267 <sup>***</sup> | [1.242,1.293] | 1.267 <sup>***</sup> | [1.242,1.293] |
| Regular smoker                                 | 1.390 <sup>***</sup> | [1.314,1.472] | 1.391 <sup>***</sup> | [1.314,1.472] | 1.391 <sup>***</sup> | [1.314,1.472] |
| <b>Practice Characteristics</b>                |                      |               |                      |               |                      |               |
| Proportion of practice female                  | 1.678 <sup>***</sup> | [1.647,1.710] | 1.678 <sup>***</sup> | [1.647,1.710] | 1.678 <sup>***</sup> | [1.647,1.710] |
| Proportion of practice under 50                | 1.855 <sup>***</sup> | [1.822,1.889] | 1.855 <sup>***</sup> | [1.822,1.889] | 1.855 <sup>***</sup> | [1.822,1.889] |
| Proportion of practice with a UK qualification | 1.139 <sup>***</sup> | [1.122,1.155] | 1.139 <sup>***</sup> | [1.122,1.155] | 1.139 <sup>***</sup> | [1.123,1.155] |
| Family practitioners per 1000 patients         | 0.983                | [0.957,1.009] | 0.983                | [0.957,1.009] | 0.983                | [0.957,1.009] |
| Practice list size                             | 0.889 <sup>***</sup> | [0.870,0.909] | 0.889 <sup>***</sup> | [0.870,0.908] | 0.889 <sup>***</sup> | [0.870,0.909] |
| <b>Time dummies (base January-March 2012)</b>  |                      |               |                      |               |                      |               |

|                     |                      |               |                      |               |                      |               |
|---------------------|----------------------|---------------|----------------------|---------------|----------------------|---------------|
| July-September 2012 | 1.053 <sup>***</sup> | [1.030,1.076] | 1.053 <sup>***</sup> | [1.030,1.076] | 1.053 <sup>***</sup> | [1.030,1.076] |
| January-March 2013  | 1.086 <sup>***</sup> | [1.062,1.110] | 1.086 <sup>***</sup> | [1.062,1.110] | 1.086 <sup>***</sup> | [1.062,1.110] |
| July-September 2013 | 1.043 <sup>***</sup> | [1.020,1.066] | 1.043 <sup>***</sup> | [1.020,1.066] | 1.043 <sup>***</sup> | [1.020,1.066] |
| January-March 2014  | 1.047 <sup>***</sup> | [1.024,1.071] | 1.047 <sup>***</sup> | [1.024,1.071] | 1.047 <sup>***</sup> | [1.024,1.071] |
| July-September 2014 | 1.011                | [0.989,1.034] | 1.011                | [0.989,1.034] | 1.011                | [0.989,1.034] |

Logistic regressions of family practitioner use in the past three months with practice characteristic interactions, for males

Standard errors are robust to heteroskedasticity and clustered at the practice level

Exponentiated coefficients; 95% confidence intervals in brackets

\*  $p < 0.05$ , \*\*  $p < 0.01$ , \*\*\*  $p < 0.001$

Table S5 Family practitioner visit in the past three months by sexual orientation among females (1,138,653): interacted sexual orientation and long-term health conditions

|                                             | Lesbian |               | Bisexual |               | Other    |               | Prefer not to say |               | Not answered |               |
|---------------------------------------------|---------|---------------|----------|---------------|----------|---------------|-------------------|---------------|--------------|---------------|
| Long term medical condition                 |         |               |          |               |          |               |                   |               |              |               |
| <b>Alzheimer's or dementia</b>              | 0.762   | [0.211,2.757] | 1.196    | [0.219,6.543] | 0.723    | [0.374,1.394] | 0.733**           | [0.582,0.922] | 0.805        | [0.609,1.064] |
| <b>Angina or other long term heart</b>      | 1.270   | [0.785,2.054] | 0.977    | [0.591,1.617] | 0.946    | [0.674,1.328] | 0.972             | [0.866,1.092] | 0.865**      | [0.786,0.952] |
| <b>Arthritis or long term joint problem</b> | 0.956   | [0.796,1.148] | 0.956    | [0.759,1.206] | 1.187    | [0.991,1.421] | 1.032             | [0.970,1.098] | 1.018        | [0.960,1.081] |
| <b>Asthma or long term chest problem</b>    | 0.837*  | [0.712,0.984] | 0.846    | [0.691,1.036] | 1.054    | [0.848,1.310] | 0.961             | [0.892,1.035] | 1.082        | [0.996,1.176] |
| <b>Blindness or severe visual</b>           | 0.714   | [0.327,1.558] | 1.371    | [0.652,2.885] | 0.891    | [0.539,1.473] | 0.925             | [0.777,1.103] | 0.979        | [0.817,1.173] |
| <b>Cancer in the last 5 years</b>           | 0.942   | [0.671,1.323] | 1.116    | [0.679,1.837] | 1.089    | [0.748,1.585] | 0.978             | [0.860,1.112] | 1.027        | [0.901,1.169] |
| <b>Deafness or severe hearing</b>           | 1.344   | [0.918,1.967] | 1.322    | [0.818,2.137] | 0.875    | [0.637,1.202] | 0.904             | [0.810,1.010] | 0.929        | [0.847,1.019] |
| <b>Diabetes</b>                             | 0.976   | [0.732,1.302] | 1.426*   | [1.027,1.979] | 1.070    | [0.845,1.356] | 1.042             | [0.962,1.127] | 0.924*       | [0.855,0.998] |
| <b>Epilepsy</b>                             | 0.873   | [0.568,1.343] | 1.049    | [0.602,1.827] | 1.101    | [0.608,1.995] | 0.898             | [0.732,1.100] | 0.859        | [0.678,1.090] |
| <b>High blood pressure</b>                  | 1.058   | [0.880,1.271] | 1.026    | [0.806,1.305] | 1.029    | [0.867,1.222] | 1.053             | [0.993,1.117] | 0.957        | [0.903,1.014] |
| <b>Kidney or liver disease</b>              | 1.056   | [0.609,1.830] | 0.673    | [0.364,1.244] | 0.989    | [0.615,1.589] | 0.734***          | [0.621,0.868] | 1.098        | [0.915,1.317] |
| <b>Learning difficulty</b>                  | 0.981   | [0.571,1.684] | 0.962    | [0.608,1.522] | 0.789    | [0.522,1.192] | 1.134             | [0.958,1.343] | 0.707*       | [0.538,0.928] |
| <b>Long term back problem</b>               | 0.931   | [0.774,1.120] | 0.817    | [0.653,1.022] | 0.924    | [0.754,1.133] | 1.008             | [0.936,1.085] | 0.980        | [0.908,1.059] |
| <b>Long term mental health problem</b>      | 1.003   | [0.816,1.234] | 0.781*   | [0.642,0.949] | 0.859    | [0.640,1.153] | 0.775***          | [0.688,0.874] | 0.858        | [0.716,1.028] |
| <b>Long term neurological problem</b>       | 1.238   | [0.845,1.812] | 1.013    | [0.642,1.599] | 0.775    | [0.505,1.191] | 0.893             | [0.758,1.053] | 1.154        | [0.908,1.467] |
| <b>Another long term condition</b>          | 1.101   | [0.935,1.296] | 0.964    | [0.790,1.177] | 0.870    | [0.716,1.056] | 0.947             | [0.883,1.015] | 1.015        | [0.926,1.112] |
| <b>Prefer not to say</b>                    | 0.735   | [0.438,1.232] | 1.297    | [0.771,2.183] | 0.461*** | [0.296,0.718] | 0.862**           | [0.770,0.965] | 0.768*       | [0.596,0.989] |
| Long standing medical condition             |         |               |          |               |          |               |                   |               |              |               |
| <b>Long standing health condition</b>       | 1.226*  | [1.049,1.433] | 1.035    | [0.861,1.244] | 0.892    | [0.750,1.062] | 1.113**           | [1.029,1.203] | 1.113**      | [1.029,1.203] |

Logistic regressions of family practitioner use in the past three months  
 Model includes all patient and practice characteristics for the main analysis (Table S2)  
 Estimates are odds-ratio relative to heterosexual with the respective health condition  
 Standard errors are robust to heteroskedasticity and clustered at the practice level  
 Exponentiated coefficients; 95% confidence intervals in brackets  
 \*  $p < 0.05$ , \*\*  $p < 0.01$ , \*\*\*  $p < 0.001$

Table S6 Family practitioner visit in the past three months by sexual orientation among males (916,643): interacted sexual orientation and long-term health conditions

|                                        | Gay     |               | Bisexual |               | Other   |               | Prefer not to say |               | Not answered |               |
|----------------------------------------|---------|---------------|----------|---------------|---------|---------------|-------------------|---------------|--------------|---------------|
| Long term medical condition            |         |               |          |               |         |               |                   |               |              |               |
| <b>Alzheimer's or dementia</b>         | 0.573   | [0.280,1.174] | 0.410    | [0.134,1.259] | 1.056   | [0.493,2.262] | 0.607**           | [0.450,0.819] | 1.056        | [0.763,1.462] |
| <b>Angina or other long term heart</b> | 1.227*  | [1.012,1.487] | 1.150    | [0.843,1.568] | 0.950   | [0.717,1.259] | 0.942             | [0.857,1.035] | 0.924        | [0.828,1.031] |
| <b>Arthritis or long term joint</b>    | 1.148   | [0.998,1.320] | 1.181    | [0.942,1.481] | 0.996   | [0.793,1.249] | 0.983             | [0.910,1.062] | 1.013        | [0.920,1.116] |
| <b>Asthma or long term chest</b>       | 0.971   | [0.860,1.096] | 1.034    | [0.823,1.300] | 1.067   | [0.835,1.363] | 0.966             | [0.889,1.049] | 1.170**      | [1.039,1.318] |
| <b>Blindness or severe visual</b>      | 0.941   | [0.584,1.516] | 0.913    | [0.479,1.740] | 0.817   | [0.461,1.448] | 0.888             | [0.720,1.096] | 0.806        | [0.625,1.039] |
| <b>Cancer in the last 5 years</b>      | 0.860   | [0.698,1.061] | 0.777    | [0.514,1.177] | 0.989   | [0.633,1.543] | 0.989             | [0.864,1.131] | 0.881        | [0.755,1.027] |
| <b>Deafness or severe hearing</b>      | 1.102   | [0.894,1.359] | 0.917    | [0.649,1.296] | 0.659*  | [0.469,0.927] | 0.923             | [0.827,1.030] | 0.948        | [0.839,1.071] |
| <b>Diabetes</b>                        | 1.194*  | [1.024,1.393] | 1.343*   | [1.067,1.689] | 1.260*  | [1.008,1.576] | 1.095*            | [1.015,1.182] | 0.952        | [0.865,1.048] |
| <b>Epilepsy</b>                        | 0.893   | [0.653,1.222] | 0.719    | [0.403,1.283] | 1.376   | [0.785,2.413] | 0.949             | [0.774,1.163] | 0.941        | [0.709,1.250] |
| <b>High blood pressure</b>             | 0.965   | [0.872,1.067] | 0.966    | [0.810,1.153] | 1.075   | [0.902,1.280] | 1.063*            | [1.001,1.129] | 0.995        | [0.919,1.079] |
| <b>Kidney or liver disease</b>         | 0.923   | [0.693,1.230] | 1.182    | [0.763,1.831] | 1.027   | [0.653,1.614] | 0.921             | [0.780,1.087] | 0.941        | [0.751,1.178] |
| <b>Learning difficulty</b>             | 0.626** | [0.445,0.881] | 1.248    | [0.775,2.010] | 1.061   | [0.696,1.619] | 1.288**           | [1.105,1.502] | 0.982        | [0.749,1.289] |
| <b>Long term back problem</b>          | 0.897   | [0.786,1.024] | 0.977    | [0.785,1.216] | 0.977   | [0.778,1.227] | 1.061             | [0.980,1.150] | 1.009        | [0.904,1.127] |
| <b>Long term mental health problem</b> | 1.246** | [1.082,1.435] | 0.826    | [0.651,1.050] | 0.791   | [0.595,1.051] | 0.834**           | [0.736,0.946] | 0.765*       | [0.617,0.949] |
| <b>Long term neurological problem</b>  | 0.867   | [0.660,1.139] | 1.053    | [0.666,1.667] | 0.759   | [0.455,1.266] | 0.792**           | [0.664,0.945] | 0.774        | [0.586,1.024] |
| <b>Another long term condition</b>     | 0.975   | [0.885,1.075] | 1.026    | [0.840,1.253] | 1.129   | [0.911,1.399] | 0.947             | [0.875,1.024] | 1.009        | [0.893,1.140] |
| <b>Prefer not to say</b>               | 0.868   | [0.664,1.134] | 0.875    | [0.511,1.497] | 0.491** | [0.297,0.812] | 0.798***          | [0.703,0.905] | 1.064        | [0.780,1.451] |
| Long standing medical condition        |         |               |          |               |         |               |                   |               |              |               |
| <b>Long standing health condition</b>  | 0.999   | [0.902,1.108] | 0.895    | [0.739,1.083] | 1.048   | [0.981,1.120] | 0.808*            | [0.664,0.983] | 1.056        | [0.949,1.174] |

Logistic regressions of family practitioner use in the past three months

Model includes all patient and practice characteristics for the main analysis (Table S2)

Estimates are odds-ratio relative to heterosexual with the respective health condition

Standard errors are robust to heteroskedasticity and clustered at the practice level

Exponentiated coefficients; 95% confidence intervals in brackets

\*  $p < 0.05$ , \*\*  $p < 0.01$ , \*\*\*  $p < 0.001$

Table S7 Family practitioner visit in by sexual orientation among females (N=1,138,653)

|                                               | 0-6 months (N=1,138,653) |               |         | 0-12months (N=1,138,653) |               |         |
|-----------------------------------------------|--------------------------|---------------|---------|--------------------------|---------------|---------|
| <b>Sexual Orientation (base heterosexual)</b> |                          |               |         |                          |               |         |
| <b>Lesbian</b>                                | 0.749                    | [0.697,0.804] | P<0.001 | 0.748                    | [0.676,0.827] | P<0.001 |
| <b>Bisexual</b>                               | 0.933                    | [0.841,1.035] | P<0.001 | 0.815                    | [0.708,0.939] | P=0.005 |
| <b>Other</b>                                  | 0.885                    | [0.800,0.979] | P=0.018 | 0.781                    | [0.678,0.900] | P=0.001 |
| <b>Prefer not to say</b>                      | 0.894                    | [0.863,0.926] | P<0.001 | 0.837                    | [0.797,0.879] | P<0.001 |
| <b>Not answered</b>                           | 1.058                    | [1.018,1.100] | P=0.004 | 1.153                    | [1.089,1.220] | P<0.001 |

Logistic regression of family practitioner use in the past six months and twelve months by females

Standard errors are robust to heteroskedasticity and clustered at the practice level

Estimates are odds-ratio relative to heterosexual interacted with respective practice characteristic

95% confidence intervals in brackets



Table S8 Family practitioner visit in by sexual orientation among males (N=916,643)

|                                               | 0-6 months (N=916,643) |               |         | 0-12months (N=916,643) |               |         |
|-----------------------------------------------|------------------------|---------------|---------|------------------------|---------------|---------|
| <b>Sexual Orientation (base heterosexual)</b> |                        |               |         |                        |               |         |
| <b>Gay</b>                                    | 1.249                  | [1.187,1.315] | P<0.001 | 1.225                  | [1.150,1.305] | P<0.001 |
| <b>Bisexual</b>                               | 1.054                  | [0.953,1.168] | P=0.300 | 1.076                  | [0.942,1.228] | P=0.280 |
| <b>Other</b>                                  | 0.877                  | [0.787,0.981] | P=0.021 | 0.869                  | [0.775,1.000] | P=0.051 |
| <b>Prefer not to say</b>                      | 0.953                  | [0.917,0.990] | P=0.013 | 0.917                  | [0.875,0.962] | P<0.001 |
| <b>Not answered</b>                           | 1.060                  | [0.999,1.125] | P=0.054 | 0.996                  | [0.922,1.076] | P=0.927 |

Logistic regression of family practitioner use in the past six months and twelve months by males

Standard errors are robust to heteroskedasticity and clustered at the practice level

Estimates are odds-ratio relative to heterosexual interacted with respective practice characteristic

95% confidence intervals in brackets

Table S9 Health care professional visit in by sexual orientation among females

|                                               | Seen either a Nurse and/or Family Practitioner in the past 3 months (N=1,135,846) |               |         | Seen a Nurse in the past 3 months (N=1,130,206) |               |         |
|-----------------------------------------------|-----------------------------------------------------------------------------------|---------------|---------|-------------------------------------------------|---------------|---------|
| <b>Sexual Orientation (base heterosexual)</b> |                                                                                   |               |         |                                                 |               |         |
| <b>Lesbian</b>                                | 0.731                                                                             | [0.686,0.779] | P<0.001 | 0.713                                           | [0.668,0.761] | P<0.001 |
| <b>Bisexual</b>                               | 0.862                                                                             | [0.792,0.939] | P=0.001 | 0.926                                           | [0.852,1.007] | P=0.072 |
| <b>Other</b>                                  | 0.813                                                                             | [0.745,0.888] | P<0.001 | 0.978                                           | [0.906,1.056] | P=0.575 |
| <b>Prefer not to say</b>                      | 0.886                                                                             | [0.858,0.914] | P<0.001 | 0.964                                           | [0.937,0.992] | P=0.012 |
| <b>Not answered</b>                           | 0.994                                                                             | [0.961,1.028] | P=0.709 | 1.044                                           | [1.013,1.076] | P=0.005 |

Logistic regression of family practitioner and nurse use in the past three months by females

Standard errors are robust to heteroskedasticity and clustered at the practice level

Estimates are odds-ratio relative to heterosexual interacted with respective practice characteristic

95% confidence intervals in brackets

Table S10 Health care professional visit in by sexual orientation among males

|                                               | Seen either a Nurse and/or GP in the past 3 months (N=914,273) |               |         | Seen a Nurse in the past 3 months (N=910,281) |               |         |
|-----------------------------------------------|----------------------------------------------------------------|---------------|---------|-----------------------------------------------|---------------|---------|
| <b>Sexual Orientation (base heterosexual)</b> |                                                                |               |         |                                               |               |         |
| <b>Gay</b>                                    | 1.208                                                          | [1.152,1.267] | P<0.001 | 1.089                                         | [1.031,1.149] | P=0.002 |
| <b>Bisexual</b>                               | 1.083                                                          | [0.987,1.190] | P=0.093 | 1.095                                         | [0.997,1.202] | P=0.058 |
| <b>Other</b>                                  | 0.879                                                          | [0.793,0.974] | P=0.014 | 1.045                                         | [0.950,1.150] | P=0.365 |
| <b>Prefer not to say</b>                      | 0.923                                                          | [0.891,0.957] | P<0.001 | 0.980                                         | [0.945,1.017] | P=0.287 |
| <b>Not answered</b>                           | 1.007                                                          | [0.953,1.063] | P=0.813 | 1.044                                         | [0.994,1.096] | P=0.087 |

Logistic regression of family practitioner and nurse use in the past three months by males

Standard errors are robust to heteroskedasticity and clustered at the practice level

Estimates are odds-ratio relative to heterosexual interacted with respective practice characteristic

95% confidence intervals in brackets

Table S11 Ordinary Least Squares regression of non-response

|                                               | Female non response (N=1,556,909) |                 | Male non response (N=1,184,012) |                 |
|-----------------------------------------------|-----------------------------------|-----------------|---------------------------------|-----------------|
| <b>Family practitioner use</b>                |                                   |                 |                                 |                 |
| <b>0-3 months</b>                             | 0.0116 <sup>***</sup>             | [0.009,0.014]   | 0.00562 <sup>***</sup>          | [0.003,0.009]   |
| <b>0-6 months</b>                             | 0.00505 <sup>**</sup>             | [0.002,0.008]   | -0.00180                        | [-0.006,0.002]  |
| <b>0-12 months</b>                            | 0.000636                          | [-0.003,0.004]  | -0.0106 <sup>***</sup>          | [-0.014,-0.007] |
| <b>Sexual Orientation (base heterosexual)</b> |                                   |                 |                                 |                 |
| <b>Lesbian/Gay</b>                            | -0.0420 <sup>***</sup>            | [-0.052,-0.032] | -0.0418 <sup>***</sup>          | [-0.049,-0.034] |
| <b>Bisexual</b>                               | -0.0147 <sup>*</sup>              | [-0.027,-0.002] | 0.0198 <sup>*</sup>             | [0.004,0.035]   |
| <b>Other</b>                                  | 0.171 <sup>***</sup>              | [0.157,0.185]   | 0.178 <sup>***</sup>            | [0.161,0.195]   |
| <b>Prefer not to say</b>                      | 0.116 <sup>***</sup>              | [0.111,0.121]   | 0.131 <sup>***</sup>            | [0.125,0.137]   |
| <b>Not answered</b>                           | 0.439 <sup>***</sup>              | [0.436,0.443]   | 0.438 <sup>***</sup>            | [0.431,0.445]   |
| <b>_cons</b>                                  | 0.213 <sup>***</sup>              | [0.210,0.216]   | 0.206 <sup>***</sup>            | [0.203,0.209]   |

Linear regression of individual non response

Standard errors are robust to heteroskedasticity and clustered at the practice level

95% confidence intervals in brackets

\*  $p < 0.05$ , \*\*  $p < 0.01$ , \*\*\*  $p < 0.001$
